# Supplementary material
Source: publisher site journal article supplement (https://www.dovepress.com/article/540982)
Supplement: Supplementary file 1 [file Table%20S1.docx]

Table S1: Expert survey on medical treatment for blepharospasm in the absence of botulinum toxin injection. An electronic questionnaire was distributed in March 2023 to members of the Thai Neuro-Ophthalmology Society and neurologists experienced in botulinum toxin use (N = 35).

| Clonazepam | 56.7% |
| --- | --- |
| Clonazepam + Amitryptyline | 6.7% |
| Clonazepam + Orphenadrine | 3.3% |
| Clonazepam + Benzhexol | 13.3% |
| Clonazepam + Lorazepam | 3.3% |
| Clonazepam + Baclofen | 3.3% |
| Clonazepam + Trihexyphenidyl + Baclofen | 3.3% |
| Clonazepam + Amitryptyline+ Artane | 3.3% |
| Benzhexol | 3.3% |
| Trihexyphenidyl | 3.3% |
|  | 100.0% |
